# Supplementary material for: High accuracy DNA sequencing on a small, scalable platform via electrical detection of single base incorporations
Source: bioRxiv or medRxiv preprint supplement (doi:10.1101/604553), 2020-05-30
Supplement: Supplementary file [file media-1.pdf]

**Supplementary Material for Esfandiyarpour, et al.**

High accuracy DNA sequencing on a small, scalable platform via electrical detection of single base incorporations

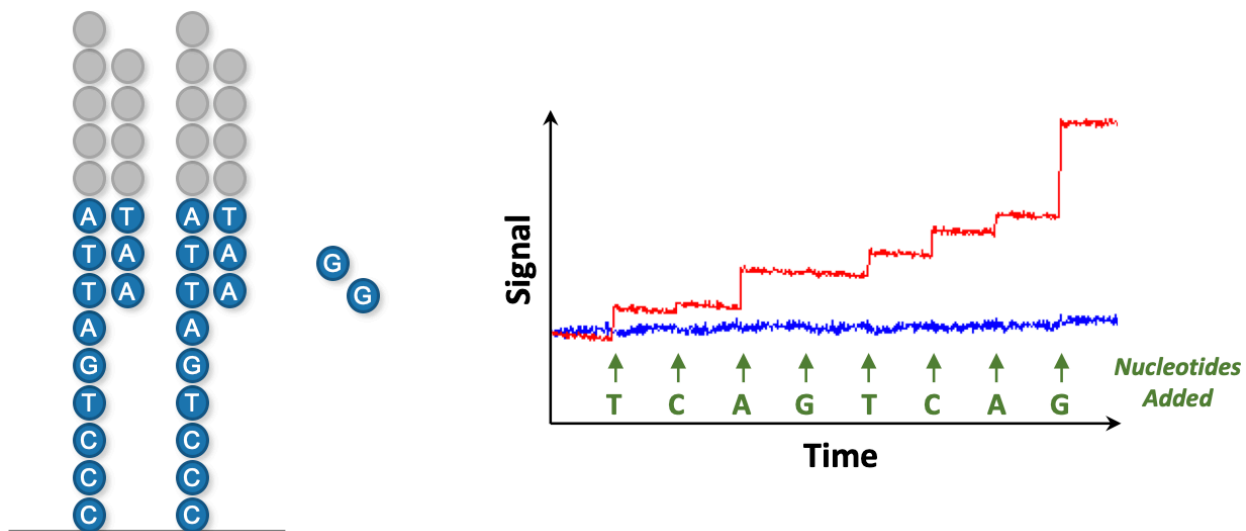

**Supplementary Figure 1: Steady-State Signal of Individual Base Incorporations**

*E. coli* Read Accuracy\* = 99.85%

| Substitution Errors | Deletion Errors | Insertion Errors |
|---------------------|-----------------|------------------|
| 0.016%              | 0.089%          | 0.044%           |

\* at base position 75

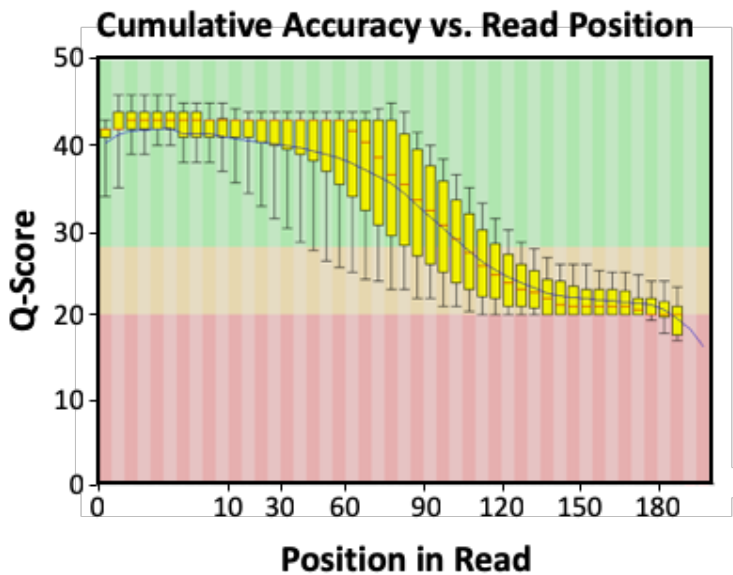

**Supplementary Figure 2: Error Types and Q-Score Distribution**

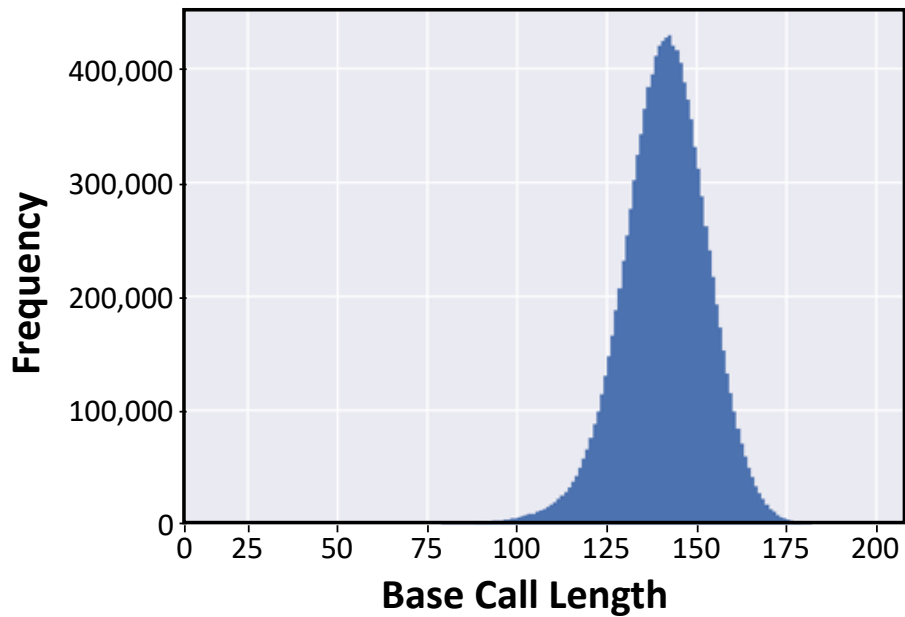

Supplementary Figure 3: Base Call Length Distribution

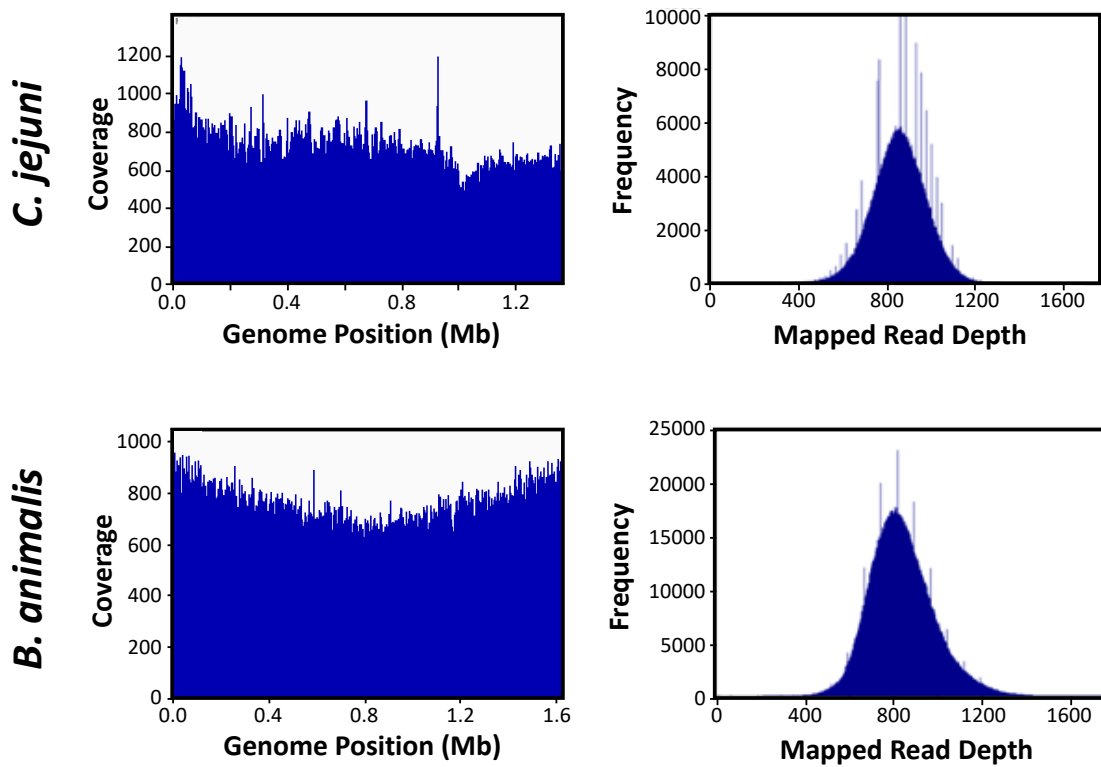

Supplementary Figure 4: Microbial Genomes

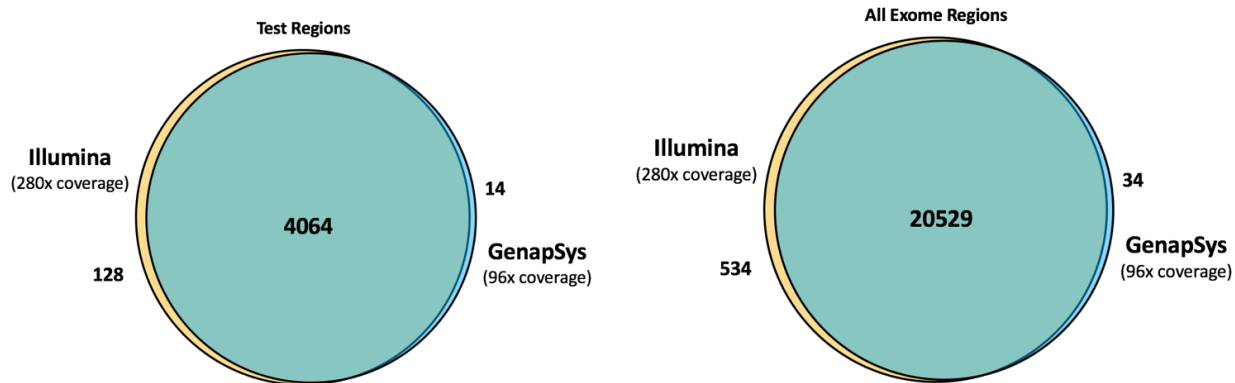

Both analyses use the high confidence regions from GIAB

Supplementary Figure 5: DeepVariant Analysis of SNPs in NA12878 Exome Data

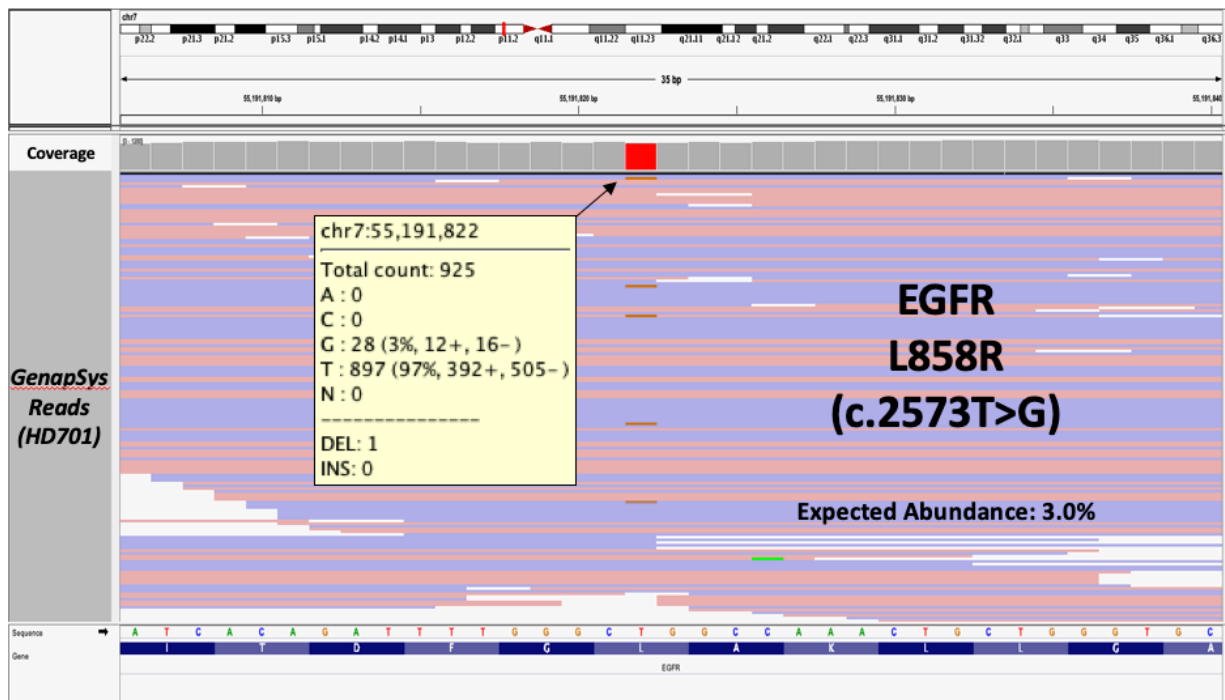

Supplementary Figure 6: Low Frequency Variant Read Visualization

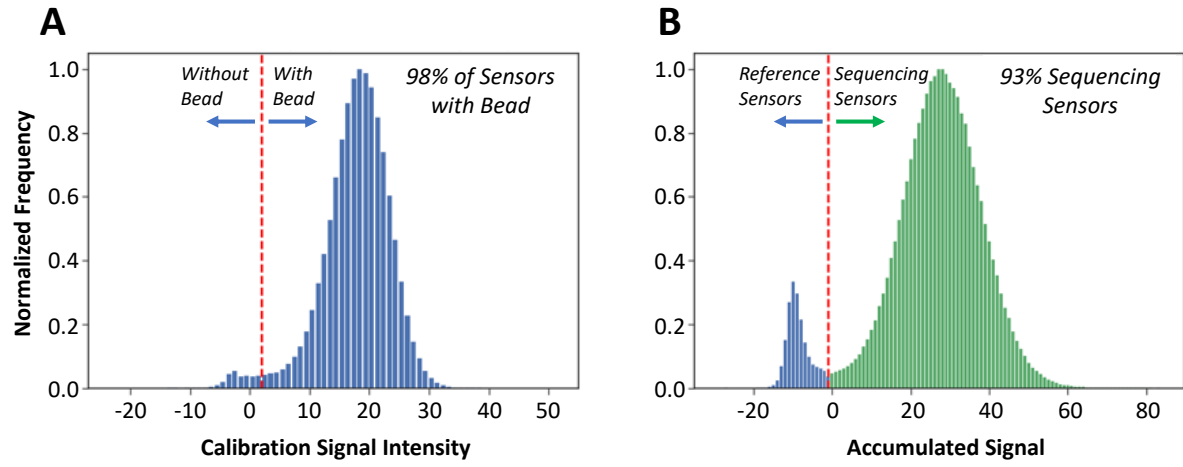

**Supplementary Figure 7: Sensor Identification and Active Sensor Determination**

**Supplementary Table 1: Genomic DNA Samples**

| DNA Name           | Description                                     | Source            | Catalog # | Genome Size | GC Content | Reference    |
|--------------------|-------------------------------------------------|-------------------|-----------|-------------|------------|--------------|
| <i>E. coli</i>     | Escherichia coli K-12                           | ATCC              | 10798D-5  | 4.69 Mb     | 51.5%      | NARG00000000 |
| <i>C. jejuni</i>   | Campylobacter jejuni NCTC11168                  | ATCC              | 700819D-5 | 1.64 Mb     | 30.5%      | AL1111168    |
| <i>B. animalis</i> | Bifidobacterium animalis subsp. Lactis DSM10140 | DSM               | 10140     | 1.94 Mb     | 60.5%      | CP001606     |
| NA12878            | Human CEPH/UTAH PEDIGREE 1463                   | Coriell           | NA12878   | 3.2 Gb      | 40.8%      | hg38         |
| HD701              | Quantitative Multiplex Reference Standard gDNA  | Horizon Discovery | HD701     | 3.2 Gb      | 40.8%      | hg38         |

**Supplementary Table 2: Targeted Sequencing Statistics**

| Statistic                                 | DNA Sample                 |                        |
|-------------------------------------------|----------------------------|------------------------|
|                                           | NA12878                    | HD701                  |
| Targeted Panel                            | xGen Exome Research (v1.0) | xGen Pan-Cancer (v1.5) |
| Panel Size                                | 39 Mb                      | 0.8 Mb                 |
| On Target Rate                            | 78.1%                      | 64.4%                  |
| Average Coverage in Target Region         | 96x                        | 624x                   |
| Number of Reads                           | 57,263,646                 | 11,542,744             |
| Number of Mapped Reads                    | 53,656,501                 | 10,528,257             |
| Number of Mapped Reads to Targeted Region | 41,922,623                 | 6,776,890              |
